# Supplementary material for: Ornithine Transcarbamylase ArgK Plays a Dual role for the Self-defense of Phaseolotoxin Producing Pseudomonas syringae pv. phaseolicola
Source: PubMed Central journal article supplement (PMC4530439; doi:10.1038/srep12892), 2015-08-10
Supplement: srep12892-s1.pdf [file srep12892-s1.pdf]

*Supplementary Information*

Ornithine Transcarbamylase ArgK Plays a Dual role for the Self-  
defense of Phaseolotoxin Producing *Pseudomonas syringae* pv.  
*phaseolicola*

Li CHEN, Pin LI, Zixin DENG, Changming ZHAO\*

Key Laboratory of Combinatorial Biosynthesis and Drug Discovery, Ministry of  
Education, and School of Pharmaceutical Sciences, Wuhan University, Wuhan,  
430071, China.

\* Correspondence: [cmzhao03@whu.edu.cn](mailto:cmzhao03@whu.edu.cn) (CZ)

Running Title: ArgK's role in PHT producers' self-defense

**Table S1** PCR Primers used in this study

| Primer name          | Primer sequence                                                    |
|----------------------|--------------------------------------------------------------------|
| DUF1                 | GCTTTTATCAGAAAAATGAAAGCTAATTTGAATTGGGGAGTCATTCCGGG<br>GATCCGTCGACC |
| DUR2                 | AGGAATTTCAAAGCTTCCTCACACCTGAATGTTAAGAGTGATTGTAGGCT<br>GGAGCTGCTTC  |
| VUF1                 | TTACGCGATGTGCAGTAGGATA                                             |
| VUR2                 | AATGGCGATACCTGACACCT AT                                            |
| DQF1                 | GATCTGGTTATTTTTGAATATTGAATTTACGAGAGGCAGTTCATTCCGGGG<br>ATCCGTCGACC |
| DQR2                 | ATGAACACTCGGAGGGCGCTAGGTATGCCTGCGGCTGCCATTGTAGGCT<br>GGAGCTGCTTC   |
| VQF1                 | CGCAGGGTTTGAGCCGATTCTA                                             |
| VQR2                 | AGTCGCCATTACTCCGTACACG                                             |
| DLF1                 | TGGGTTCTTGTGCCGCAATTTAAAGGAAATTAACCGGTGATTCCGGGGA<br>TCCGTCGACC    |
| DLR2                 | TGCAAAGCTGATCTGAAAGGCATCGGCGAAACACTTTTCATGTAGGCTG<br>GAGCTGCTTC    |
| VLF1                 | TGGACCATTCAACTTTTGGCCGTCA                                          |
| VLR2                 | GCGAATGAGATGAGGTATCTGGCAA                                          |
| P <sub>phtA</sub> F1 | TAAGATTAGCGGATCCCATTAGTGTAGGCAGGGC                                 |
| P <sub>phtA</sub> R2 | ACTTATTACTTCCTTTTTTCGT                                             |
| PhtUF1               | AAGGAAGTAATAAGTATGACGAATATATTAATGG                                 |
| PhtUR2               | CGACTCTAGAGGATCCTTAGTATGAAAGAGATACA                                |
| PhtQF1               | AAGGAAGTAATAAGTGTGCCAATGAAAAAATAATAT                               |
| PhtQR2               | CGACTCTAGAGGATCCTCAAAGTGGTTCAGAACTA                                |
| OKF1                 | CGCGGATCCATGAAGATTACAAGCCTGAAAAACC                                 |
| OKR2                 | CCGCTCGAGTCAGGGGACGACTGTCTCCAGCATC                                 |

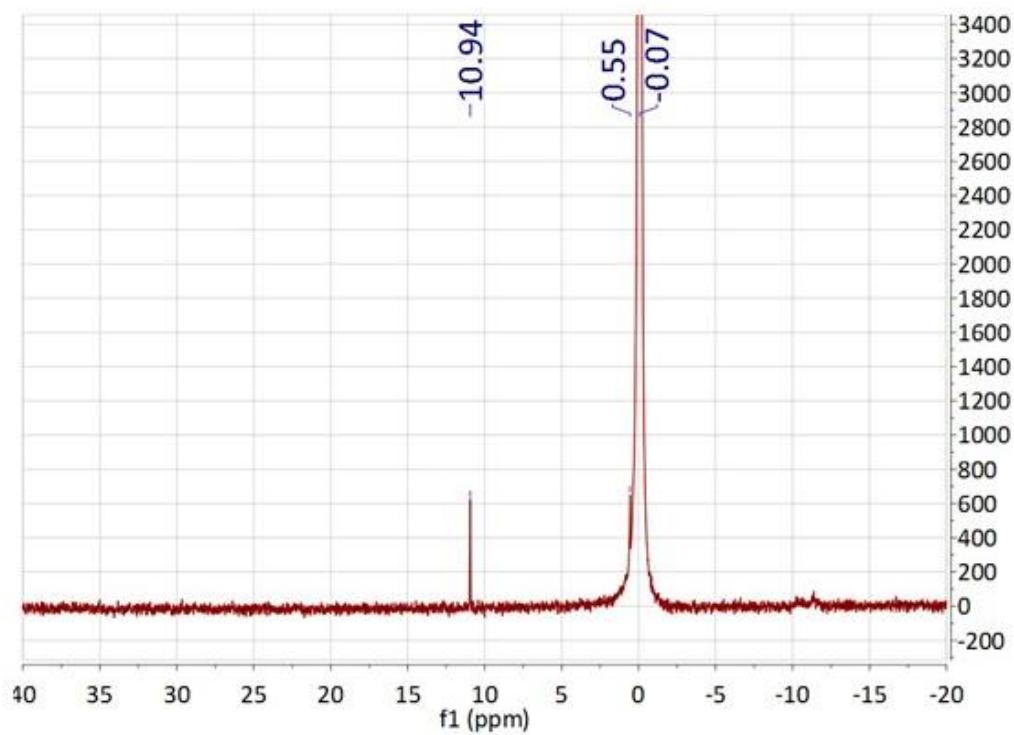

**Figure S1**  $^{31}\text{P}$  NMR spectrum of PHTs produced by *Pseudomonas syringae* pv. *phaseolicola* 1448A.

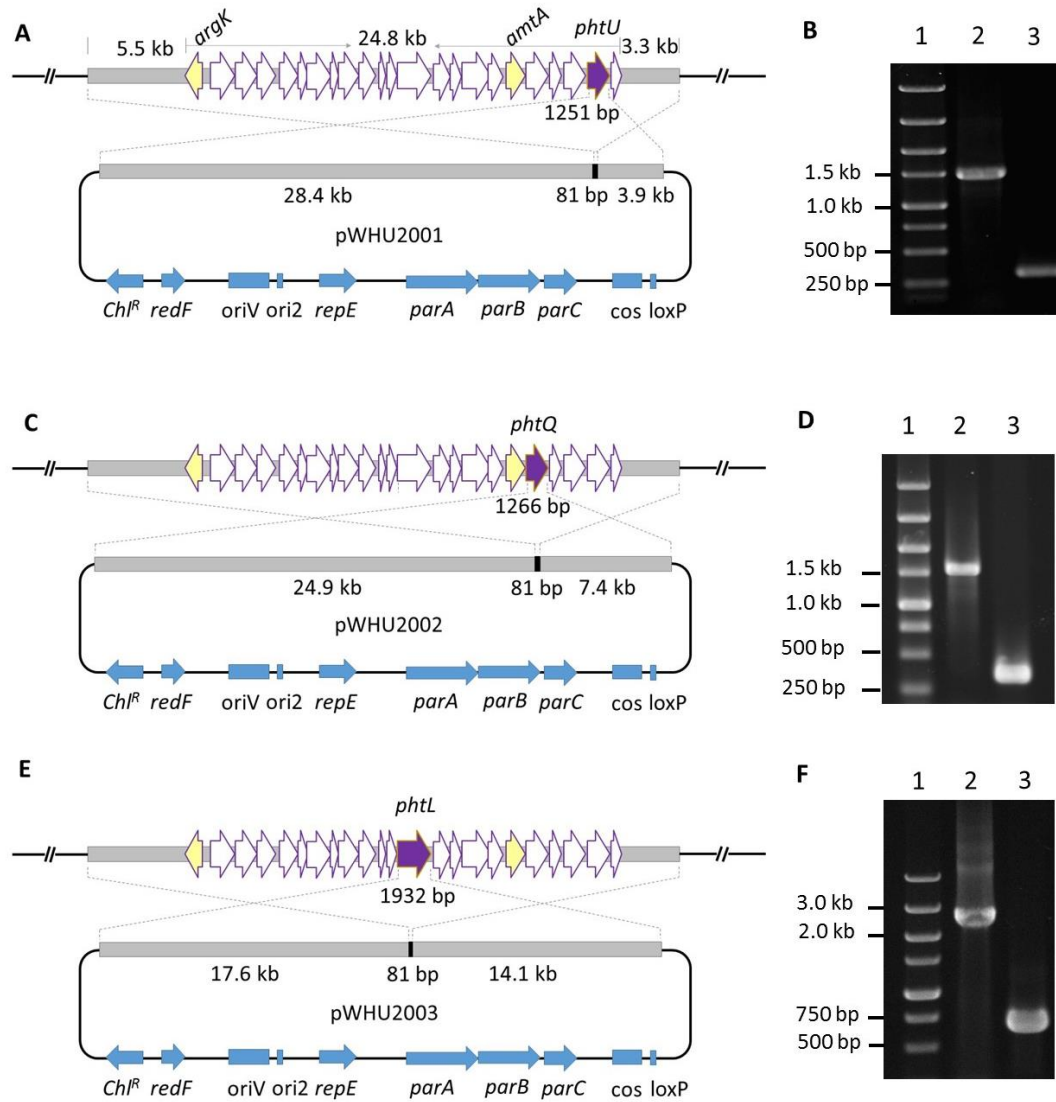

**Figure S2** In-frame deletion of PHT biosynthesis related gene *phtU* (A), *phtQ* (C)

and *phtL* (E), and PCR validation of *phtU*<sup>-</sup> (B), *phtQ*<sup>-</sup> (D) and *phtL*<sup>-</sup> (F) mutants.

B, lane 1, DNA marker; lane 2, wild type (1471 bp); lane 3, *phtU*<sup>-</sup> mutant (301 bp).

D, lane 1, DNA marker; lane 2, wild type (1531 bp); lane 3, *phtQ*<sup>-</sup> mutant (265 bp).

F, lane 1, DNA marker; lane 2, wild type (2499 bp); lane 3, *phtL*<sup>-</sup> mutant (648 bp).

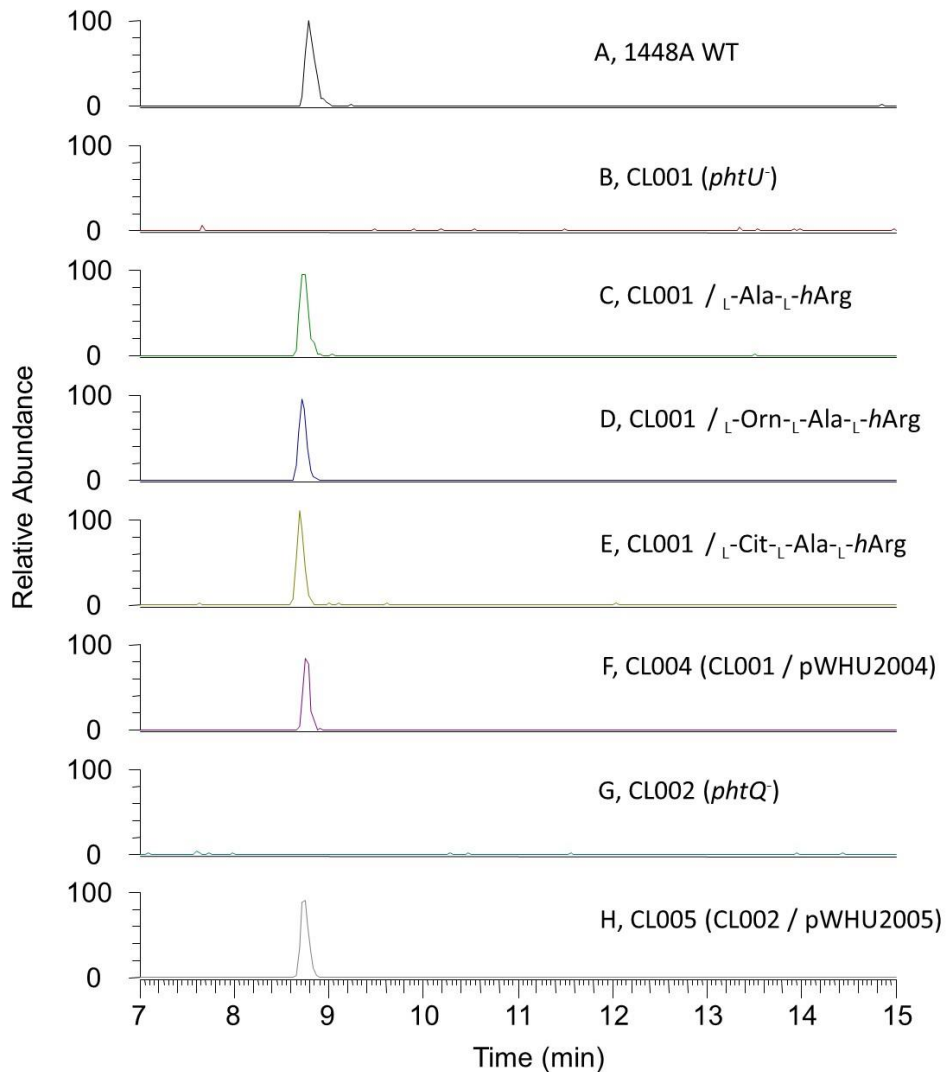

**Figure S3** Extracted ion chromatograms of PHTs from culture supernatants of gene in-frame deletion mutants. Extracted with a tolerance of 0.5 Da. A, 1448A (PHT producer, wild type); B, *phtU* mutant strain CL001; C, *phtU* mutant strain CL001 fed with L-Ala -L-hArg; D, *phtU* mutant strain CL001 fed with L-Orn- L-Ala- L-hArg; E, *phtU* mutant strain CL001 fed with L-Cit- L-Ala- L-hArg; F, *phtU* mutant gene complementation strain CL004, with infusion gene  $P_{phtA}$ -ORF $_{phtU}$  in pWHU2004; G, *phtQ* mutant strain CL002; H, *phtQ* mutant gene complementation strain CL005, with infusion gene  $P_{phtA}$ -ORF $_{phtQ}$  in pWHU2005.

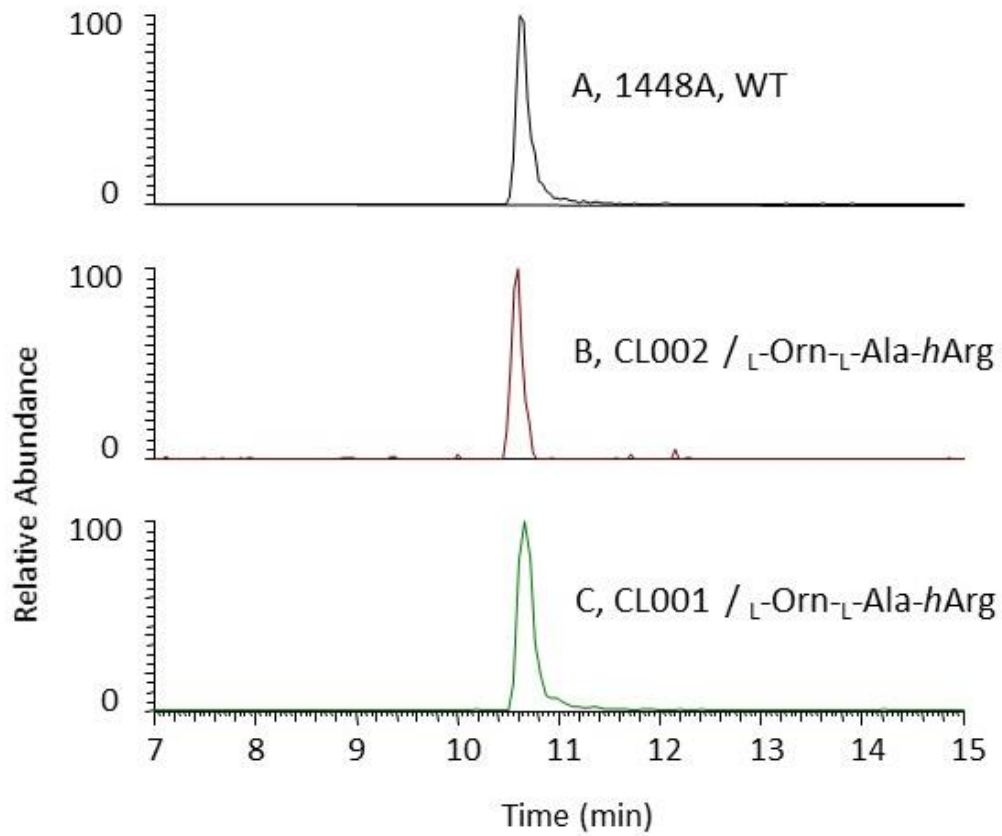

**Figure S4** Extracted ion chromatograms of  $L$ -Cit-  $L$ -Ala-  $L$ - $h$ Arg from mutant strains culture supernatants. Extracted with a tolerance of 0.5 Da. A, 1448A (PHT producer, wild type); B, *phtQ* mutant strain CL002 fed with  $L$ -Orn-  $L$ -Ala-  $L$ - $h$ Arg as substrate; C, *phtU* mutant strain CL001 fed with  $L$ -Orn-  $L$ -Ala-  $L$ - $h$ Arg as substrate.

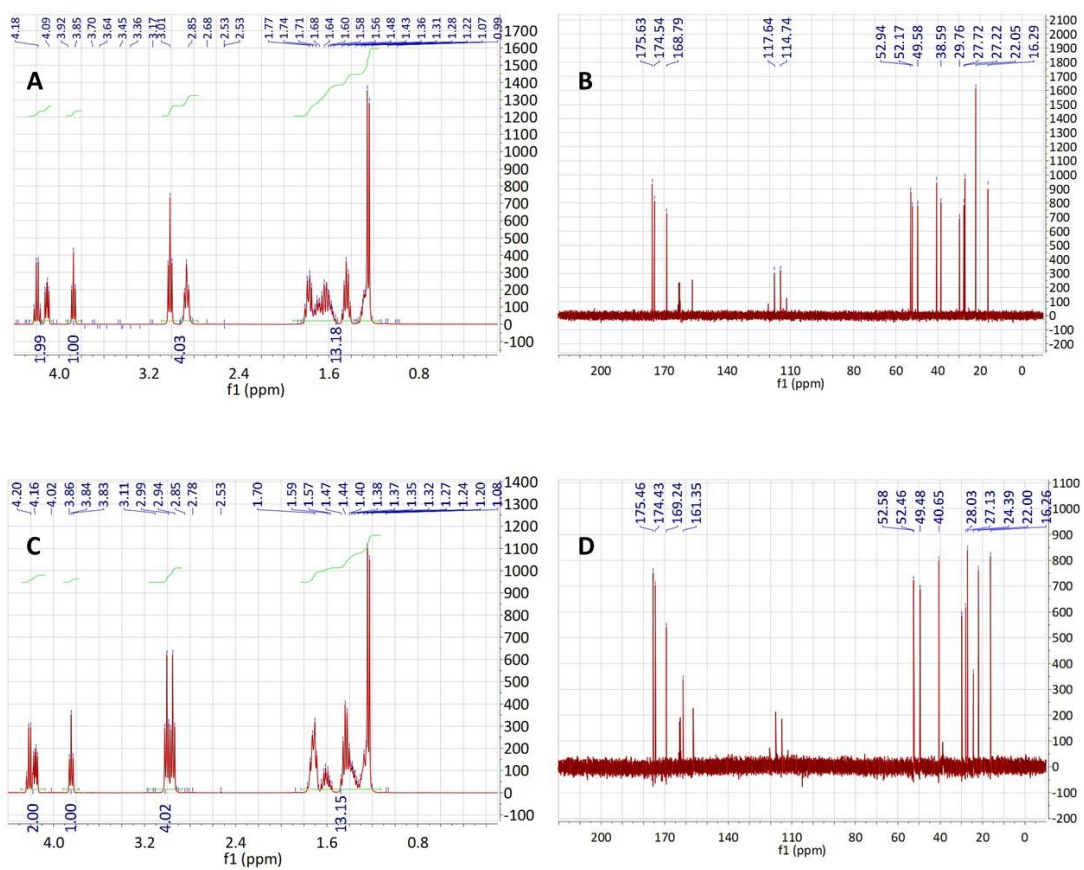

**Figure S5**  $^1\text{H}$  spectra of tripeptide standards  $\text{L-Orn-L-Ala-L-hArg}$  (A) and  $\text{L-Cit-L-Ala-L-hArg}$  (C) and  $^{13}\text{C}$  NMR spectra of  $\text{L-Orn-L-Ala-L-hArg}$  (B) and  $\text{L-Cit-L-Ala-L-hArg}$  (D).
